# Supplementary material for: Improving residents' handovers through just-in-time training for structured communication
Source: PubMed Central journal article supplement — BMJ Qual Improv Rep. 2016 Feb 8;5(1):u209900.w4090. doi: 10.1136/bmjquality.u209900.w4090 (PMC4752704; doi:10.1136/bmjquality.u209900.w4090), 2016-02-08
Supplement: bmjqir-5-u209900-w4090-s2.pdf [file bmjqir-5-u209900-w4090-s2.pdf]

Figure 1. Observation protocol used to evaluate the quality of handovers.

| Date                                           |                                     |    |     |           |       |
|------------------------------------------------|-------------------------------------|----|-----|-----------|-------|
| Presenter                                      |                                     |    |     |           |       |
| R1                                             | R2                                  | R3 | R4  | R5        | Staff |
| Receiver                                       |                                     |    |     |           |       |
| R1                                             | R2                                  | R3 | R4  | R5        | Staff |
| SBARR HANDOVER EVALUATION                      |                                     |    | Yes | Sometimes | No    |
| <b>S</b>                                       | Patient Identifiers Provided        |    |     |           |       |
|                                                | Code Status Noted                   |    |     |           |       |
| <b>B</b>                                       | Includes Essential Info             |    |     |           |       |
|                                                | Leaves out Important Info           |    |     |           |       |
|                                                | Includes Unimportant Info           |    |     |           |       |
| <b>A</b>                                       | Clinical Condition Described        |    |     |           |       |
|                                                | Sickest Patients Clearly Identified |    |     |           |       |
| <b>R</b>                                       | To Dos provided                     |    |     |           |       |
|                                                | Contingency Plans (If/Then)         |    |     |           |       |
| <b>R</b>                                       | Seeks understanding                 |    |     |           |       |
|                                                | Time for Questions                  |    |     |           |       |
|                                                | Clarifying Questions Asked          |    |     |           |       |
| Other Questions                                |                                     |    |     | Yes       | No    |
| Printed Handoff Document Shared?               |                                     |    |     |           |       |
| Clear who is accepting Responsibility?         |                                     |    |     |           |       |
| Was SBARR format clearly Followed?             |                                     |    |     |           |       |
| Was Handover Presented in an Organized Fashion |                                     |    |     |           |       |
| Was the Setting Quiet/Free of Interruptions?   |                                     |    |     |           |       |

Note: R1 through R5 indicates Resident and her or his year in the program.
