# Supplementary figures and images for: Improving residents' handovers through just-in-time training for structured communication
Source: PubMed Central journal article supplement — BMJ Qual Improv Rep. 2016 Feb 8;5(1):u209900.w4090. doi: 10.1136/bmjquality.u209900.w4090 (PMC4752704; doi:10.1136/bmjquality.u209900.w4090), 2016-02-08

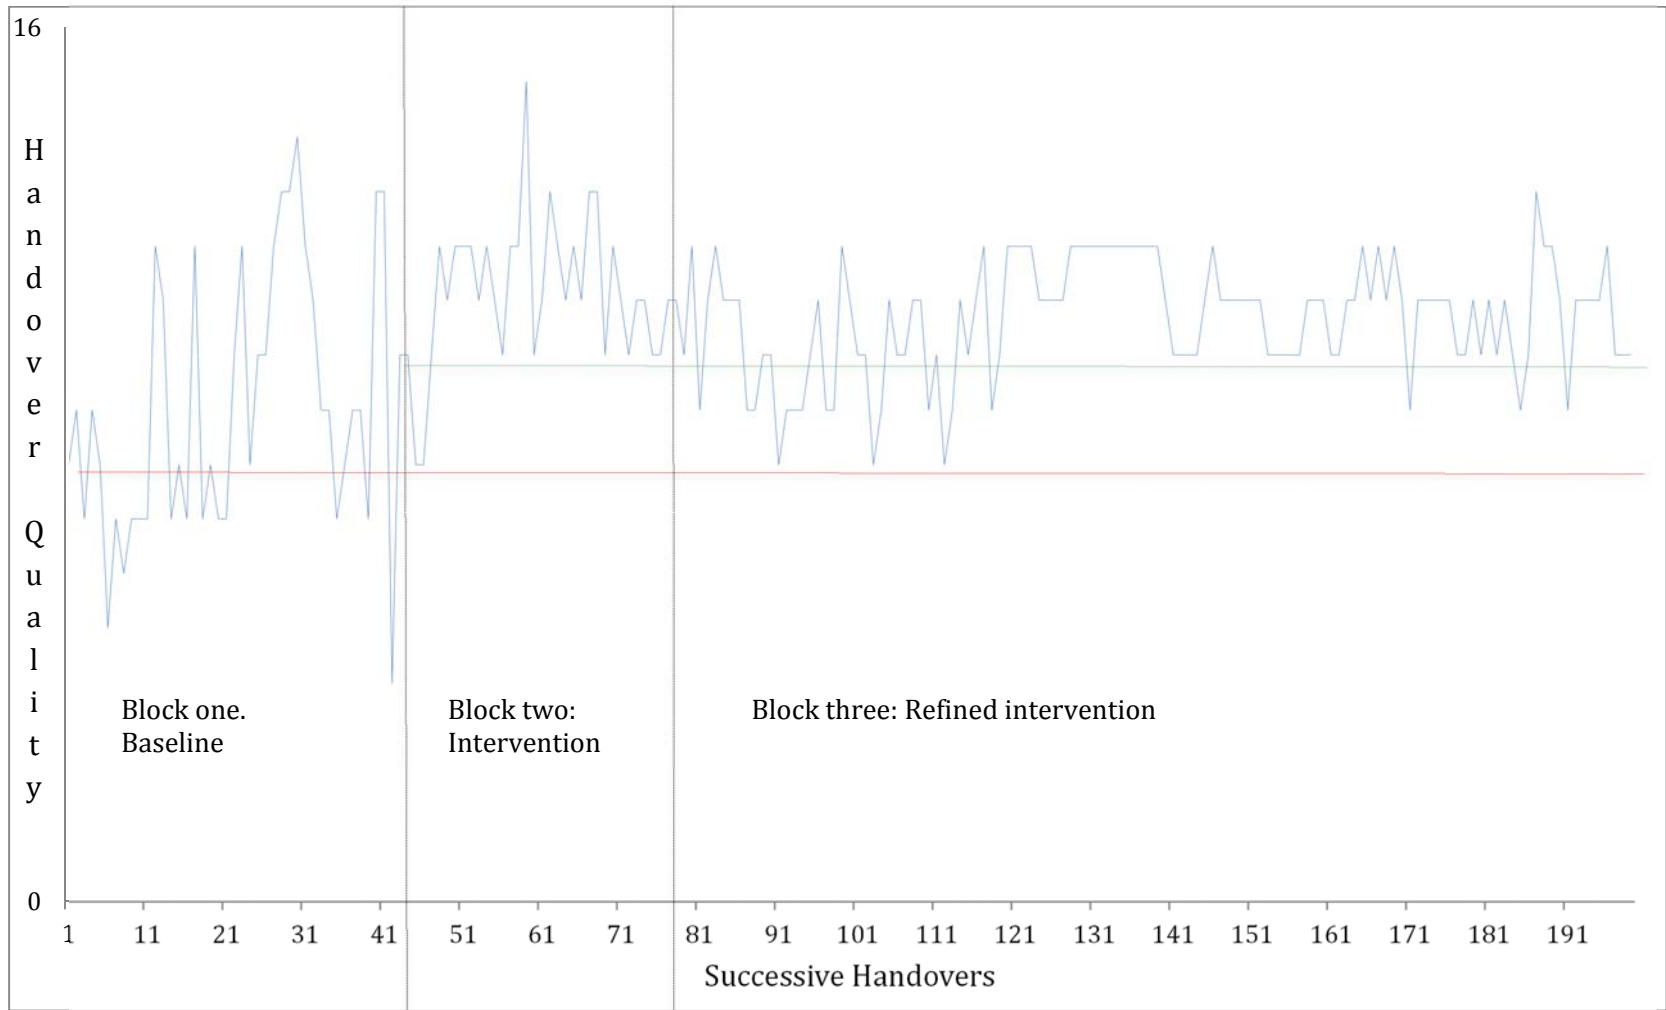

Supplement: bmjqir-5-u209900-w4090-s1.pdf [file bmjqir-5-u209900-w4090-s1.pdf]
